# Supplementary material
Source: MDPI journal article supplement (https://www.mdpi.com/1999-4907/12/7/868)
Supplement: s1 [file s1]

**Table S1.** Principal component statistics of the growth traits and wood properties in 19 *Catalpa bungei* clones.

| Component | Standard deviation | Proportion of Variance /% | Cumulative Proportion /% |
|-----------|--------------------|---------------------------|--------------------------|
| PC1       | 2.252              | 63.4                      | 63.4                     |
| PC2       | 1.349              | 22.8                      | 86.2                     |
| PC3       | 0.805              | 8.1                       | 94.3                     |
| PC4       | 0.418              | 2.2                       | 96.5                     |
| PC5       | 0.373              | 1.7                       | 98.2                     |
| PC6       | 0.309              | 1.2                       | 99.4                     |
| PC7       | 0.211              | 0.6                       | 99.9                     |
| PC8       | 0.070              | 0.1                       | 100.0                    |

**Table S2.** Loading of principal component.

| Traits | PC1    | PC2   | PC3    | PC4    | PC5    | PC6    | PC7    | PC8    |
|--------|--------|-------|--------|--------|--------|--------|--------|--------|
| Height | -0.116 | 0.682 | 0.227  | 0.246  | -0.274 | 0.570  | -0.084 | 0.056  |
| DBH    | -0.168 | 0.663 | -0.034 | -0.236 | 0.050  | -0.686 | 0.031  | 0.023  |
| HES    | 0.333  | 0.274 | -0.610 | 0.267  | 0.574  | 0.162  | 0.053  | -0.112 |
| HTS    | 0.408  | 0.094 | -0.284 | -0.509 | -0.461 | 0.164  | 0.480  | -0.124 |
| HRS    | 0.423  | 0.005 | -0.258 | 0.077  | -0.410 | -0.170 | -0.724 | 0.168  |
| CSP    | 0.386  | 0.099 | 0.461  | -0.552 | 0.447  | 0.187  | -0.299 | -0.020 |
| BD     | 0.413  | 0.033 | 0.382  | 0.405  | -0.105 | -0.252 | 0.115  | -0.656 |
| ADD    | 0.428  | 0.016 | 0.263  | 0.281  | 0.042  | -0.155 | 0.365  | 0.714  |

**Table S3.** Principal component scores of 19 clones.

| Clone | Scores |        |        |        |        |        |        |        |
|-------|--------|--------|--------|--------|--------|--------|--------|--------|
|       | PC1    | PC2    | PC3    | PC4    | PC5    | PC6    | PC7    | PC8    |
| 1-1   | -0.065 | 1.158  | -0.143 | -0.249 | -0.147 | -0.656 | 0.349  | -0.007 |
| 1-2   | 1.064  | -0.896 | 0.906  | -0.202 | -0.517 | 0.311  | 0.174  | -0.047 |
| 1-3   | -2.930 | -2.030 | -0.224 | -0.101 | -0.036 | -0.018 | -0.098 | 0.092  |
| 1-4   | -1.263 | 2.100  | 0.921  | 0.438  | -0.662 | 0.004  | -0.083 | 0.085  |
| 2-1   | 0.808  | 0.646  | -0.750 | 0.156  | -0.294 | 0.290  | -0.108 | -0.007 |
| 2-2   | 0.289  | 0.846  | 0.120  | -0.872 | 0.234  | 0.500  | 0.193  | -0.092 |
| 2-6   | -1.262 | -1.143 | -1.248 | 0.287  | -0.060 | -0.112 | -0.060 | -0.067 |
| 2-8   | -0.440 | 1.045  | -0.320 | 0.122  | -0.138 | 0.159  | 0.268  | 0.021  |
| 001-1 | 0.566  | 1.284  | -0.511 | -0.013 | -0.500 | 0.196  | -0.428 | -0.079 |
| 002-1 | -1.415 | 0.280  | -0.689 | -0.720 | 0.168  | -0.072 | 0.154  | 0.069  |
| 008-1 | -2.214 | -1.005 | 0.177  | 0.339  | 0.161  | 0.448  | 0.100  | -0.019 |
| 013-1 | -0.232 | -1.055 | 1.683  | 0.348  | 0.517  | -0.149 | -0.118 | -0.118 |
| 015-1 | -1.960 | 0.124  | 0.853  | -0.114 | 0.262  | -0.063 | 0.004  | 0.002  |
| 9-1   | -3.723 | 0.145  | -0.754 | 0.551  | 0.092  | -0.357 | 0.095  | -0.059 |
| 9-2   | 5.617  | -0.697 | -0.039 | 0.762  | 0.104  | 0.088  | 0.335  | 0.055  |
| 7080  | 0.053  | -0.138 | 1.401  | -0.292 | -0.022 | -0.187 | -0.193 | 0.108  |
| 01    | 1.523  | 2.513  | -0.499 | 0.158  | 0.965  | 0.114  | -0.235 | 0.057  |
| H3    | 4.024  | -0.400 | -0.148 | -0.374 | -0.149 | -0.595 | -0.176 | -0.068 |
| DY    | 1.560  | -2.775 | -0.737 | -0.226 | 0.023  | 0.100  | -0.174 | 0.076  |

**Table S4.** Genetic gain for different scenario.

| Clone             | Height<br>(m) | DBH<br>(cm) | HES<br>(N) | HTS<br>(N) | HRS<br>(N) | CSP<br>(Mpa) | BD<br>(g·cm <sup>-3</sup> ) | ADD<br>(g·cm <sup>-3</sup> ) |
|-------------------|---------------|-------------|------------|------------|------------|--------------|-----------------------------|------------------------------|
| <b>Scenario A</b> |               |             |            |            |            |              |                             |                              |
| General mean      | 8.00          | 10.00       | 3348.47    | 2840.66    | 2365.46    | 40.74        | 0.397                       | 0.477                        |
| 1-1               | 8.24          | 11.33       | 3407.13    | 2991.43    | 2331.35    | 40.31        | 0.400                       | 0.480                        |
| 1-4               | 9.46          | 11.47       | 3070.44    | 2622.69    | 2214.44    | 39.54        | 0.400                       | 0.470                        |
| 008-1             | 8.90          | 11.39       | 4200.94    | 2989.05    | 2587.08    | 44.11        | 0.410                       | 0.500                        |
| 9-1               | 8.68          | 10.62       | 3584.20    | 3068.26    | 2699.06    | 40.93        | 0.400                       | 0.470                        |
| Selected mean     | 8.82          | 11.20       | 3565.68    | 2917.86    | 2457.98    | 41.22        | 0.403                       | 0.480                        |
| Genetic gain /%   | 7.75          | 9.06        | 5.08       | 2.08       | 2.49       | 1.01         | 1.19                        | 0.62                         |
| <b>Scenario B</b> |               |             |            |            |            |              |                             |                              |
| 002-1             | 7.34          | 8.34        | 4158.87    | 3625.41    | 3214.43    | 46.00        | 0.480                       | 0.590                        |
| 008-1             | 8.90          | 11.39       | 4200.94    | 2989.05    | 2587.08    | 44.11        | 0.410                       | 0.500                        |
| 7080              | 7.20          | 9.54        | 3770.25    | 3530.58    | 3150.36    | 45.69        | 0.450                       | 0.540                        |
| DY                | 6.45          | 7.86        | 3413.84    | 3084.87    | 2733.25    | 41.36        | 0.400                       | 0.490                        |
| Selected mean     | 7.47          | 9.28        | 3885.98    | 3307.48    | 2921.28    | 44.29        | 0.435                       | 0.530                        |
| Genetic gain /%   | -5.03         | -5.45       | 12.58      | 12.57      | 14.94      | 7.43         | 8.48                        | 10.02                        |
| <b>Scenario C</b> |               |             |            |            |            |              |                             |                              |
| 2-1               | 8.33          | 10.07       | 3681.39    | 3102.43    | 2641.26    | 40.41        | 0.400                       | 0.480                        |
| 2-2               | 8.39          | 10.40       | 3453.06    | 3113.52    | 2243.71    | 43.57        | 0.390                       | 0.470                        |
| 008-1             | 8.90          | 11.39       | 4200.94    | 2989.05    | 2587.08    | 44.11        | 0.410                       | 0.500                        |
| 9-1               | 8.68          | 10.62       | 3584.20    | 3068.26    | 2699.06    | 40.93        | 0.400                       | 0.470                        |
| Selected mean     | 8.58          | 10.62       | 3729.90    | 3068.32    | 2542.78    | 42.26        | 0.400                       | 0.480                        |
| Genetic gain /%   | 5.43          | 4.66        | 8.93       | 6.13       | 4.76       | 3.18         | 0.63                        | 0.69                         |
